# Supplementary material for: An evolutionary and structural characterization of mammalian protein complex organization
Source: PubMed Central journal article supplement (PMC2645396; doi:10.1186/1471-2164-9-629), 2008-12-23
Supplement: 1471-2164-9-629-S3.pdf [file 1471-2164-9-629-S3.pdf]

### Additional file 3: Yeast complex complexity and participation distributions

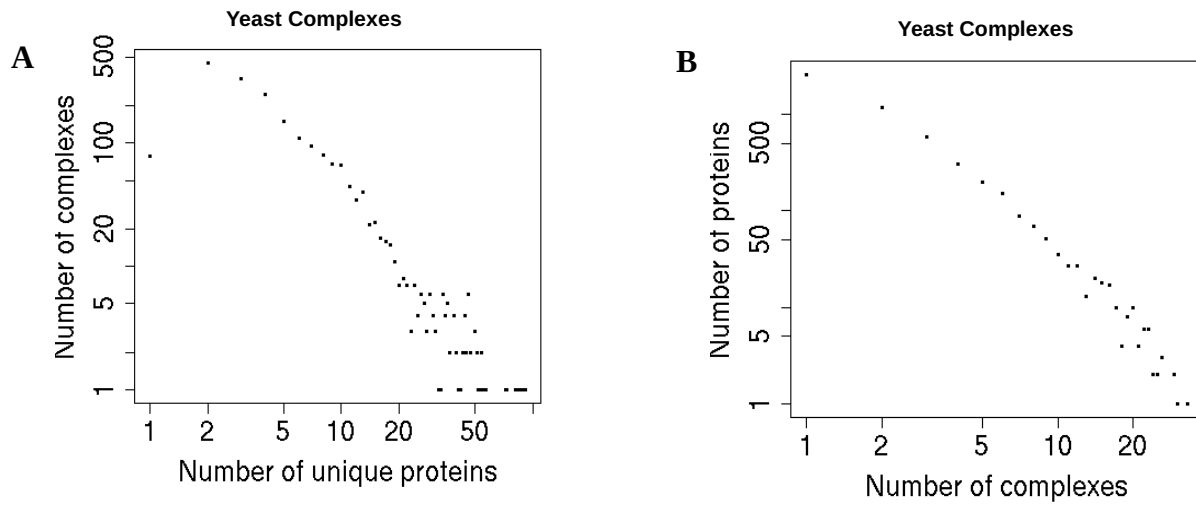

**Figure S3.** (A) Complex complexity exhibits a broad-tail power law-like distribution when the number of unique proteins increases past a certain point. (B) The number of yeast proteins (y-axis) participating in a particular number of complexes (x-axis) also exhibits a power-law like distribution.
