# Supplementary material for: An evolutionary and structural characterization of mammalian protein complex organization
Source: PubMed Central journal article supplement (PMC2645396; doi:10.1186/1471-2164-9-629), 2008-12-23
Supplement: 1471-2164-9-629-S7.pdf [file 1471-2164-9-629-S7.pdf]

## Additional file 7: Length distribution of human mitochondrial proteins

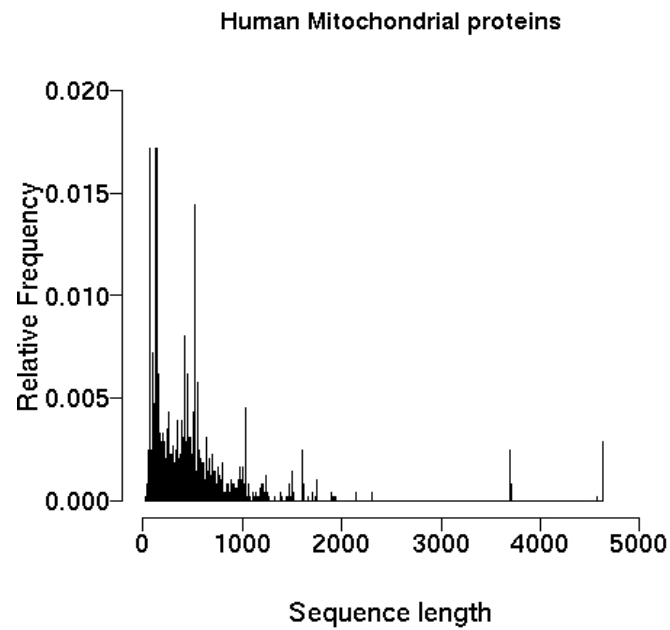

**Figure S7. Human mitochondrial protein length distribution.** The length distribution of mitochondrial proteins from the Eukaryotic Subcellular Localization Database is plotted. Over 97% of the mitochondrial proteins have lengths < 1000 aa.
