# Supplementary material for: An evolutionary and structural characterization of mammalian protein complex organization
Source: PubMed Central journal article supplement (PMC2645396; doi:10.1186/1471-2164-9-629), 2008-12-23
Supplement: 1471-2164-9-629-S10.pdf [file 1471-2164-9-629-S10.pdf]

**Additional file 10: Protein complexes and dN/dS based on orthologs from a variety of species  
Complexes and dN/dS based on Human-Dog Orthologs**

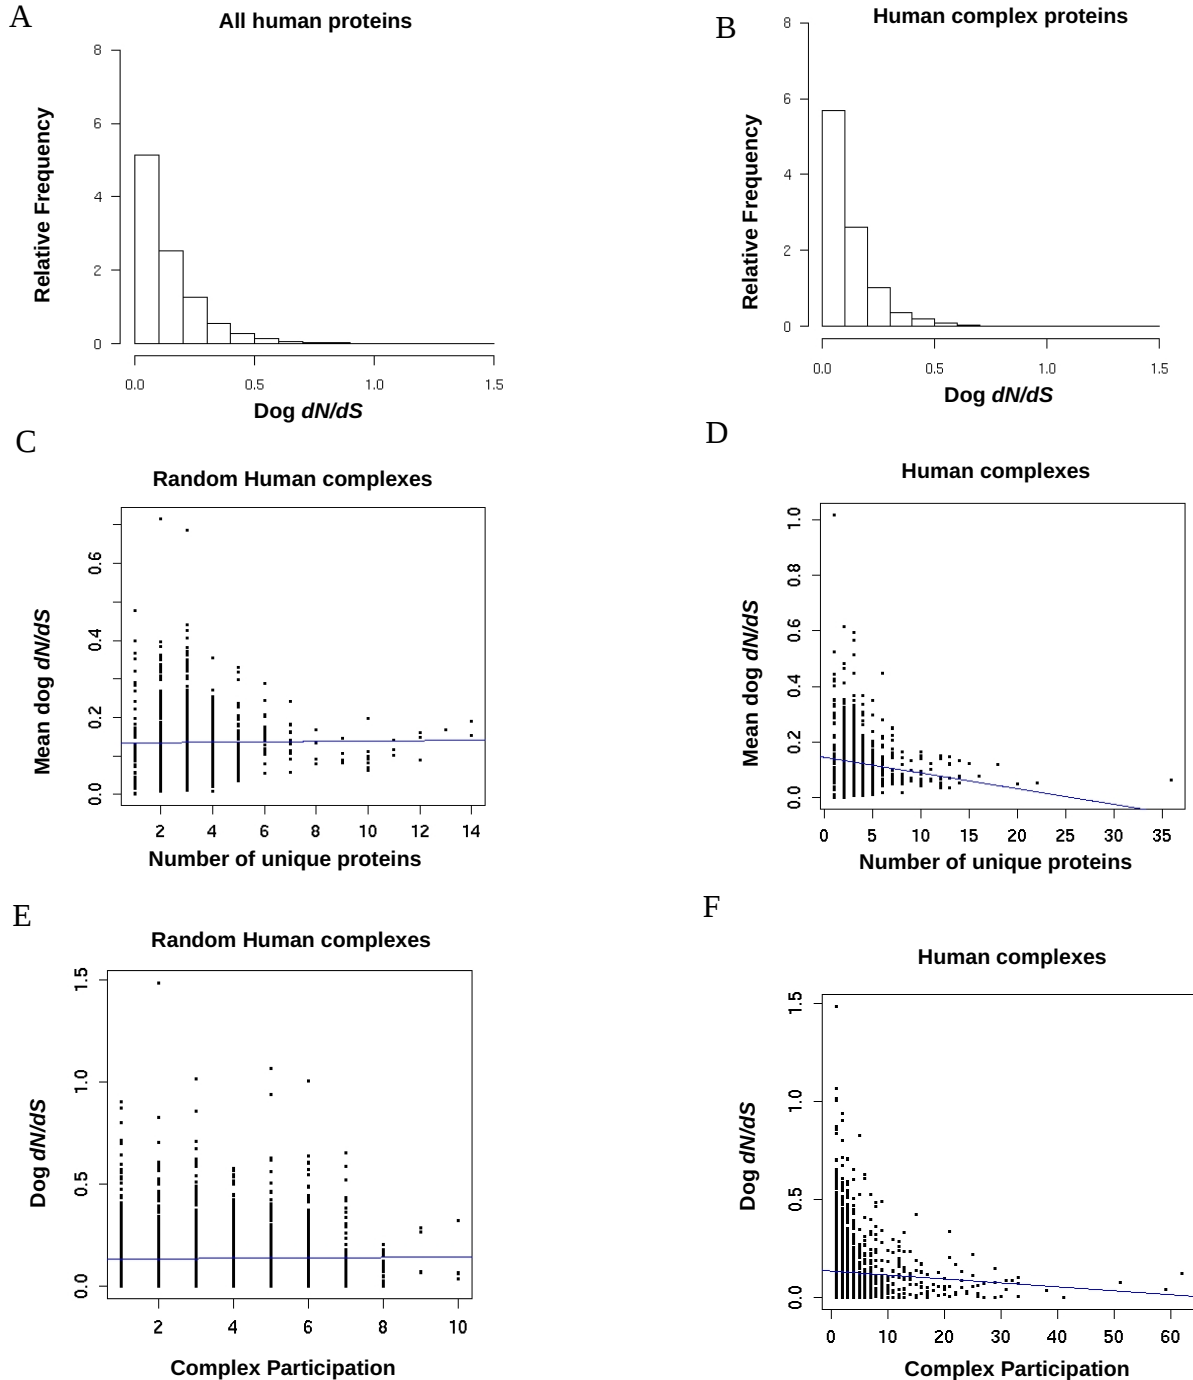

**Figure S10a - Complexes and Selection.** The dN/dS distribution of genes associated with A) all human proteins and B) proteins in the human complex data. D) The mean dN/dS ratio for human-dog orthologs is plotted against the number of unique proteins for each complex. Complexes with more unique proteins tend to have significantly smaller mean dN/dS ratios than those with less unique proteins (t-test:  $P < 4.7 \times 10^{-8}$ ). F) The dN/dS ratios for human-dog orthologs are plotted against the number of complexes they participate in. Proteins participating in more complexes have significantly lower dN/dS ratios than those with less complex participation (t-test:  $P < 2.1 \times 10^{-8}$ ). C,E) Both trends are rarely observed for Model 1 random complexes.

## Complexes and dN/dS based on Human-Chimp Orthologs

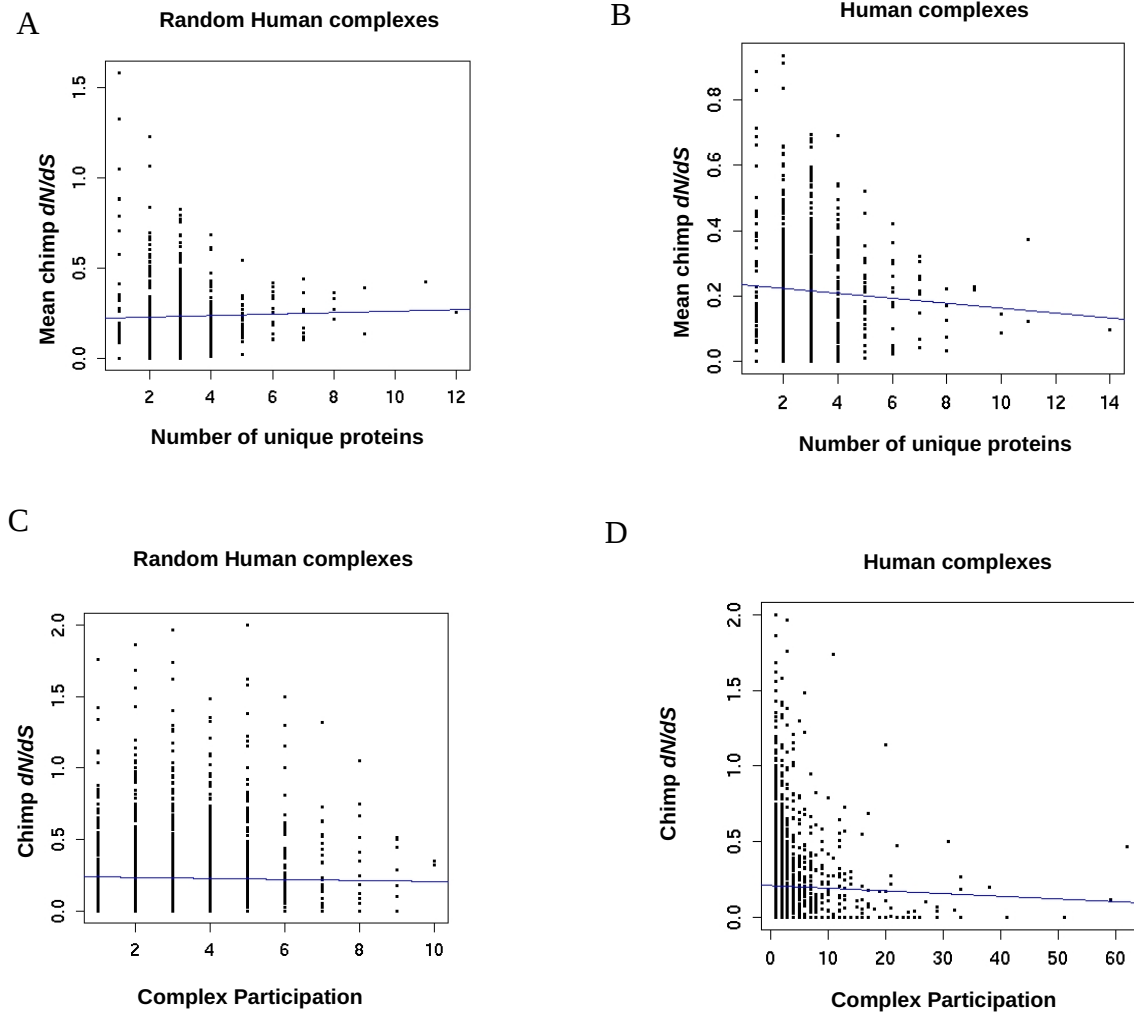

**Figure S10b - Complexes and Selection.** B) The mean dN/dS ratio for human-chimp orthologs is plotted against the number of unique proteins for each complex. Complexes with more unique proteins were not considered to have significantly smaller mean dN/dS ratios than those with less unique proteins (t-test:  $P = 0.1$ ). D) The dN/dS ratio for human-chimp orthologs is plotted against the number of complexes they participate in. Proteins participating in more complexes have significantly lower dN/dS ratios than those with less complex participation (t-test:  $P < 0.0002$ ). A,C) Such trends were not observed in model 1 random complexes.

## Complexes and dN/dS based on Human-Rat Orthologs

A

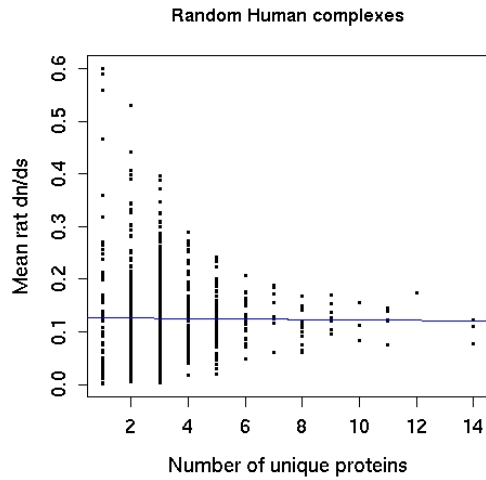

B

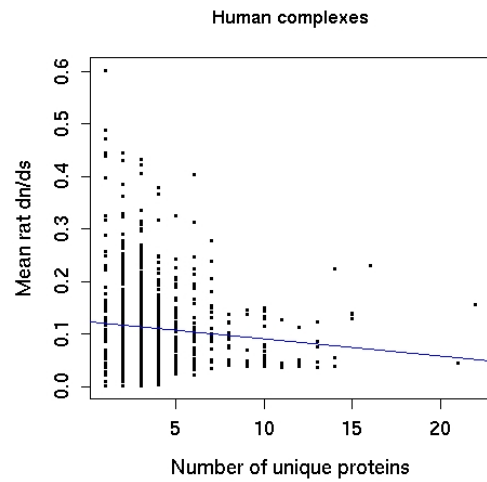

C

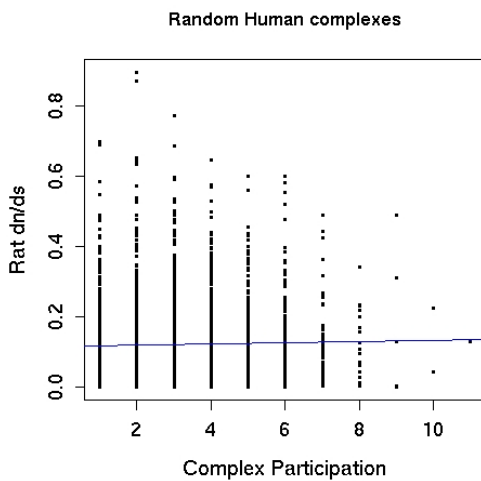

D

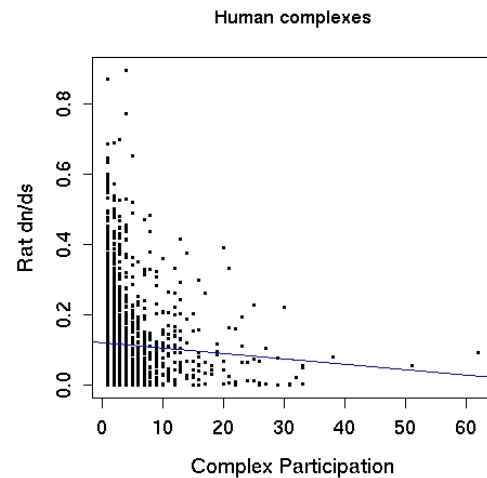

**Figure S10c - Complexes and Selection.** B) The mean dN/dS ratio for human-rat orthologs is plotted against the number of unique proteins for each complex. Complexes with more unique proteins tend to have significantly smaller mean dN/dS ratios than those with less unique proteins (t-test:  $P < 0.002$ ). D) The dN/dS ratio for human-rat orthologs is plotted against the number of complexes they participate in. Proteins participating in more complexes have significantly lower dN/dS ratios than those with less complex participation (t-test:  $P < 2.1 \times 10^{-5}$ ). A,C) Such trends were not observed in model 1 random complexes.

## Complexes and dN/dS (*S. cerevisiae*-*S. mikatae* Orthologs)

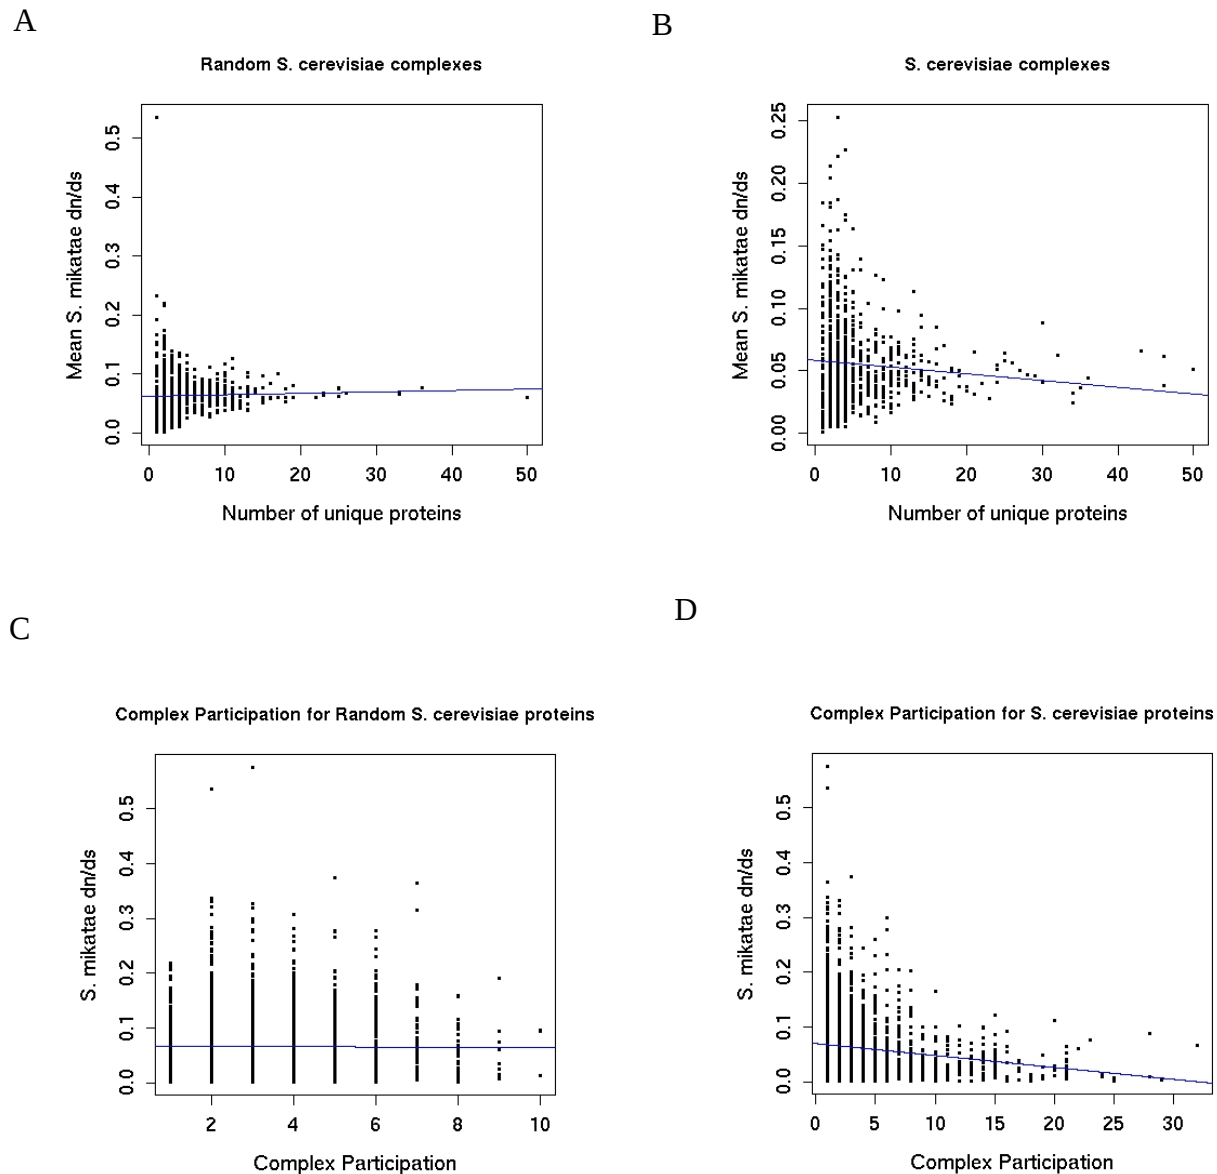

**Figure S10d - Complexes and Selection on Yeast Genes.** B) The mean dN/dS ratio for *S. cerevisiae*-*S. mikatae* orthologs is plotted against the number of unique proteins for each yeast complex. Complexes with more unique proteins tend to have significantly smaller mean dN/dS ratios than those with less unique proteins (t-test:  $P < 0.001$ ). D) The dN/dS ratios for *S. cerevisiae*-*S. mikatae* orthologs are plotted against the number of complexes they participate in. Proteins participating in more complexes have significantly lower dN/dS ratios than those with less complex participation (t-test:  $P < 2 \times 10^{-16}$ ). A,C) Such trends were not observed in model 1 random complexes.

## Complexes & dN/dS (*S.cerevisiae*-*S.paradoxus* Orthologs)

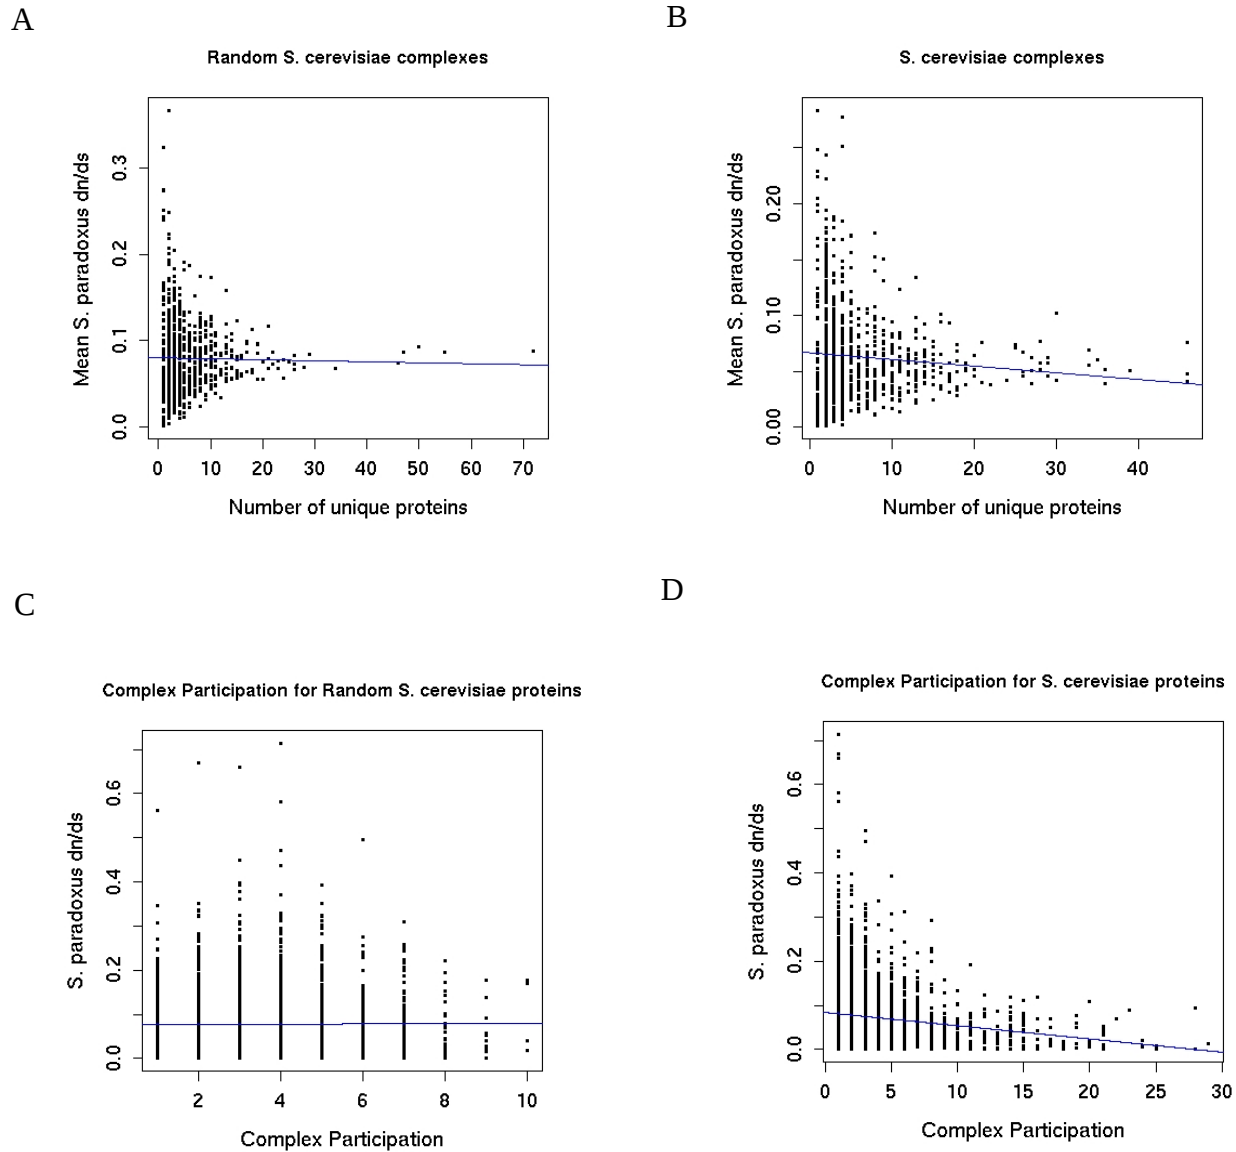

**Figure S10e - Complexes and Selection on Yeast Genes.** B) The mean dN/dS ratio for *S. cerevisiae*-*S. paradoxus* orthologs is plotted against the number of unique proteins for each yeast complex. Complexes with more unique proteins tend to have significantly smaller mean dN/dS ratios than those with less unique proteins (t-test:  $P < 0.002$ ). D) The dN/dS ratios for *S. cerevisiae*-*S. paradoxus* orthologs are plotted against the number of complexes they participate in. Proteins participating in more complexes have significantly lower dN/dS ratios than those with less complex participation (t-test:  $P < 2 \times 10^{-16}$ ). A,C) Such trends were not observed in model 1 random complexes.
