# Supplementary material for: An evolutionary and structural characterization of mammalian protein complex organization
Source: PubMed Central journal article supplement (PMC2645396; doi:10.1186/1471-2164-9-629), 2008-12-23
Supplement: 1471-2164-9-629-S14.pdf [file 1471-2164-9-629-S14.pdf]

## Additional file 14: Homogeneity of Protein Properties in Yeast Complexes

| Protein Complex Data                                   | Property     | Mean Stdev. Annotated | Mean Stdev. Random |
|--------------------------------------------------------|--------------|-----------------------|--------------------|
| <i>S. cerevisiae</i>                                   | pI           | 1.6 ± 0.6 (1.7)       | 1.8 ± 0.5 (1.9)    |
| <i>S. cerevisiae</i>                                   | % Helix      | 15.9 ± 6.1 (16.0)     | 16.8 ± 5.8 (16.9)  |
| <i>S. cerevisiae</i>                                   | % Sheet      | 6.7 ± 2.9 (6.4)       | 7.1 ± 3.1 (6.8)    |
| <i>S. cerevisiae</i>                                   | % Coil       | 11.3 ± 4.9 (10.9)     | 12.5 ± 4.9 (12.3)  |
| <i>S. cerevisiae</i><br>(against <i>S. paradoxus</i> ) | <i>dN/dS</i> | 0.06 ± 0.04 (0.06)    | 0.08 ± 0.13 (0.07) |

**Table S14:** Homogeneity of Protein Properties in Yeast Complexes of 3 or more proteins

The standard deviations of protein property values for each annotated complex are significantly smaller than ones for complexes generated randomly by picking proteins with replacement (MC-test using 1000 complexes generated randomly with replacement:  $P < 0.001$ ). The means  $\pm$  standard deviation of these standard deviations for each property are shown in the last two columns along with median values (in parentheses).
